# Supplementary material for: An Early Low Latitude Aurora Observed by Rozier (Beziers, 1780)
Source: Copernicus journal article supplement (doi:10.5194/angeo-2020-1), 2020-02-13
Supplement: Supplementary file 1 [file angeo-2020-1-supplement.pdf]

1 **Supplementary Material 1**

2 Link to the Source Image preserved at Bibliotheque nationale de France with sign: Bibliotheque de  
3 Meto-France, 2015-97519.

4 <https://gallica.bnf.fr/ark:/12148/bpt6k96043313/f2.image> (Last URL access: February 13<sup>th</sup> 2020)

5 <https://gallica.bnf.fr/ark:/12148/cb399860128/date.item> (Last URL access: February 13<sup>th</sup> 2020)

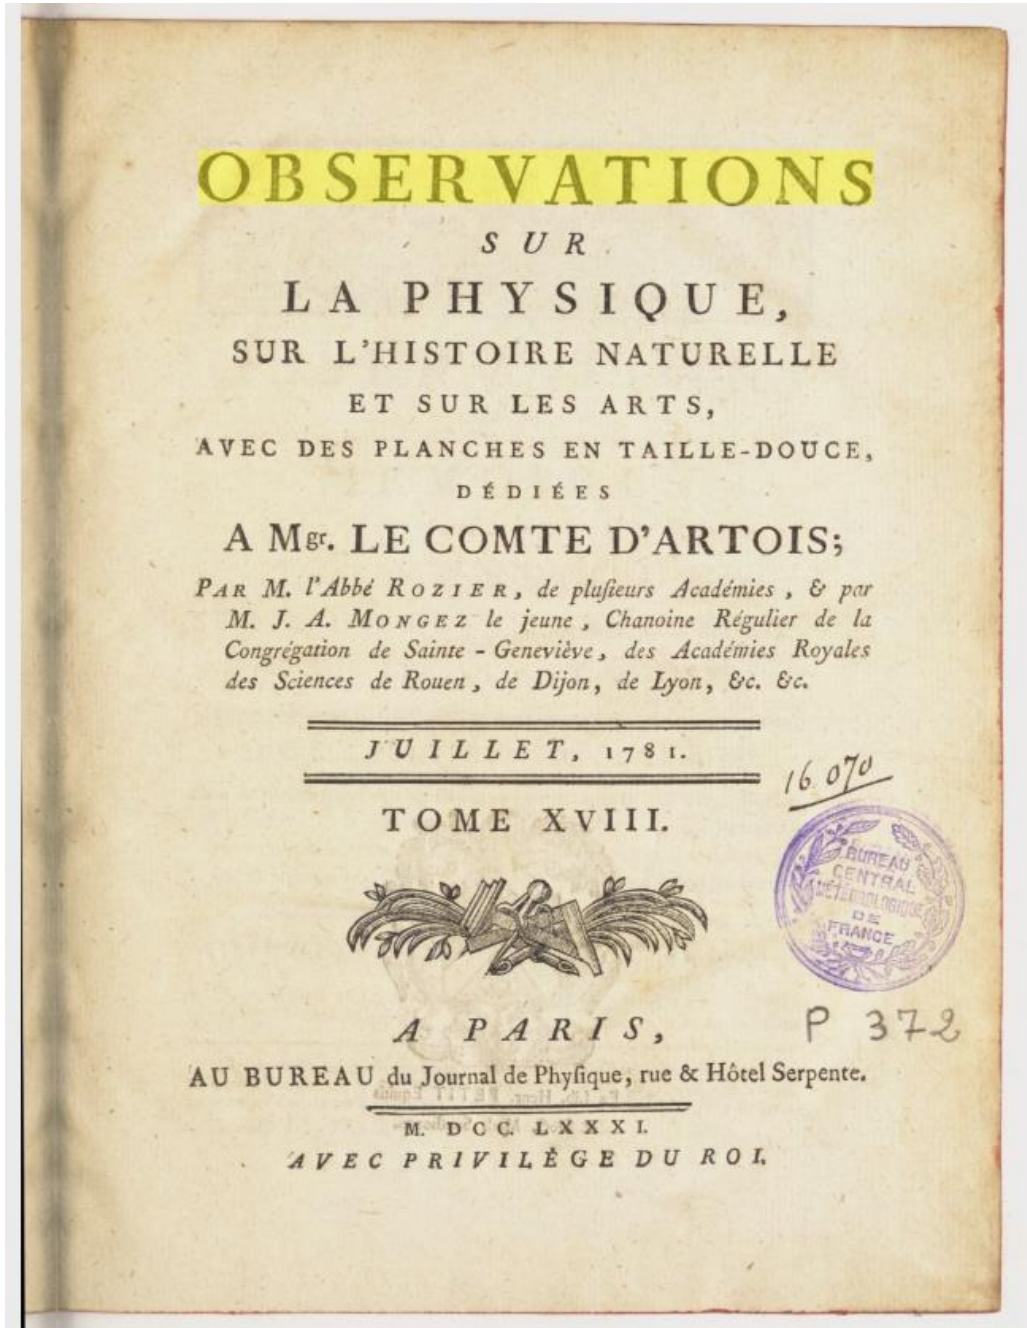

6

7 **Reference:**

8 Rozier, F. 1781. Observations sur la physique, sur l'histoire naturelle, et sur les arts/ Par M. l'abbé  
9 Rozier. Tome XVIII Bureau du Journal de physique (Paris).

10 Link to the original translated document:

11 [https://gallica.bnf.fr/ark:/12148/bpt6k9609788t.r=phosphoriqueobservations%20phosphorique%20](https://gallica.bnf.fr/ark:/12148/bpt6k9609788t.r=phosphoriqueobservations%20phosphorique%20observations?rk=278971;2)  
12 [observations?rk=278971;2](https://gallica.bnf.fr/ark:/12148/bpt6k9609788t.r=phosphoriqueobservations%20phosphorique%20observations?rk=278971;2) (Last URL access: February 13<sup>th</sup> 2020)

13

## 14 **English Translation of the Rozier`s Observation**

15

### 16 **About a dense cloud made phosphoric by an overabundance of electricity,** 17 **observed from Beausejour near Bezier, August 15:**

18 The temperature of this day was 25.5 °C; the barometer foresaw a storm: white big  
19 clouds moved (travelled) in the upper area of the atmosphere during the whole day  
20 and the sun hides behind a mass of these clouds that intertwine each other.

21 At 7 pm, the atmosphere changed more and more; the clouds seemed to leave the  
22 upper region to lower towards the earth, and a heavy and intense weather took away  
23 the possibility to breathe easily. The closer the night approached, the more the clouds  
24 were pushed (or swelled) and accumulated towards the great chain of mountains of  
25 the third order that cross the low-Languedoc from east to west.

26 At 7.45 am the uncertain light of some flash (lightning?) started from the west coast,  
27 suggesting that the thunder roared too far (long) to be heard. Little by little the flashes  
28 multiplied, it happened with surprising speed, and the sound of the thunders began to  
29 be audible.

30 At 8 pm, the winds opposed each other and gave different directions to the clouds;  
31 however, the winds from the west were always the dominant. At this time the tones  
32 were doubled on the side of the mountain, and the sky was all of fire. Night has come;  
33 it was no longer possible to distinguish the direction of the clouds because the vivacity  
34 of the light of the flashes made the obscurity following (which came later) them deeper  
35 and deeper; finally, the orange darted rapidly from west to east, and it was terrible  
36 toward the mountain.

37 At 8.05 am it was completely night. It was at this moment that, examining the direction  
38 and the effects of the flashes, I noticed behind the slope of the hill, which on one side  
39 blocks the view from my house, a bright spot. This light did not look like that of a candle  
40 seen from afar, nor that which spreads from a forest or grass when they are set on  
41 fire. It seemed to me to have the whitish color of phosphorus burning in the open air,  
42 or rather of that of mercury stirred in a tube without air.

43 This bright spot gradually acquired volume and space (but perhaps intensity). It  
44 imperceptibly formed an area, a phosphoric band that appeared to my eyes at a height  
45 of 3 feet: and starting from the top of the hill almost to Beziers, this area seemed to  
46 form the base of a 60 ° angle, whose summit corresponded to my eye (from whose  
47 top it responded to my eye).

48 On this first luminous area, a second one of the same height formed and it had only  
49 30 ° of extension (width), or half of that of the lower area. Between them remained a  
50 void whose height equaled that of one of the two areas considered separately.

51 Even if these two zones followed a horizontal direction, it is not to be believed that their  
52 line of demarcation followed exactly a straight line. We noticed on both some  
53 irregularities, roughly as on the edges of that big white cloud, before it was orange-  
54 colored, and these edges were not all equally luminous (they were not all bright at the  
55 same way) even if the center of the zones showed a uniform light.

56 During the period of time when these areas were moving eastward, the lightning and  
57 thunder noise were more rapid; finally, at three different times, the (a) flash started  
58 from the end of the lower area. But an object worthy of note is that the noise following  
59 these flashes, if there was one, was weak and I would dare to say almost null because  
60 I could not distinguish it from the noise of the thunder that was starting from the upper  
61 region and from a greater distance. Every flash, launched by the general mass, made  
62 me clearly appreciate the vines, the crops, the top (croup) and the sinuosity of the  
63 small mountains located in front of the big chain.

64 That light helped me to understand that the areas were closer to me and did not belong  
65 to the mass of clouds pushed by the winds towards the mountain.

66 This phenomenon shone from 8.05 until 8.17. In this instant a blow of wind from the  
67 south changed the direction of the clouds, bringing them closer to the big mountain  
68 chain, and the orange moved away from Beziers.

69 It would seem that (there is all the appearance that) these areas were a simple mass  
70 of vapors, only charged by electricity, which made them transparent and phosphoric.  
71 It is proved by the fact that three times the flash disappeared (it is gone) and the trail  
72 of light left by the flash appeared to be more than twice the diameter of normal flashes.  
73 The (apparent) proximity of the objects could, it is true, be due to these optical effects  
74 (having part inside these optical objects).

75 I am led to believe that these areas were detached entities (bodies) and that they did  
76 not belong to the mass of the other clouds because the mountains were visible behind  
77 them when the flash formed (started from; departed from) from the big mass; finally,  
78 when the flash started from these areas, there was no explosion.

79 I don't know if such a phenomenon has been observed elsewhere; but I never read  
80 anything that can be compared to it.

81

82 **Reference:**

83 Rozier, F. 1781. Observations sur la physique, sur l'histoire naturelle, et sur les arts/ Par M. l'abbé  
84 Rozier. Tome XVIII Bureau du Journal de physique (Paris).
