# Supplementary material for: An Early Low Latitude Aurora Observed by Rozier (Beziers, 1780)
Source: Copernicus journal article supplement (doi:10.5194/angeo-2020-1), 2020-02-13
Supplement: Supplementary file [file angeo-2020-1-AC2-supplement.pdf]

Dear Editor,

The authors want to thank the reviewers for their work on the submitted paper.

In the following, specific answers to the comments are reported and all changes in the new revised manuscript are highlighted in yellow.

## Reviewer #2:

Referee Report on MS angeo-2019-97 “An Early Low Latitude Aurora Observed by Rozier (Beziers, 1780)” by Bertolin et al.

## General Comments

R2: This is an interesting case report for the mid-latitude aurora on 1780 August 15 likely at Beauséjour near Béziers. The mid-latitude auroral report in 1780 is especially important, as this will be a footprint of solar eruption and a hint for contemporary solar activity where we do not have enough coverage of sunspot observations. Overall, I think this manuscript will be an interesting contribution, while further clarifications and explanations are needed both on its background and discussions. I have listed my comments below and wish the authors to address them. Their language needs to be improved as well, preferably with professional grammatical proofreading.

*A: Thank you very much for this constructive report. We answered all the comments pointed out by you. We put special attention in the reorganization and improvement of the background and the discussion. The full text of the paper was revised by an English mother tongue reviewer.*

## Specific Comments

### 1. Introduction

R2: The scientific background of this article should be improved. Rather than associating “Incursions of high-energy particles from space, mainly solar wind, strongly interact with the Earth’s magnetosphere” with the cause of auroral display, I would explicitly mention the coronal mass ejection with southward interplanetary magnetic field as a cause of auroral displays in low to mid magnetic latitude.

*A: We have rewritten and enlarge the background section including specific references to coronal mass ejection as cause of low to mid aurora (LMLA) as follows: “Low and Mid latitude auroras (LMLAs) are usually associated with intense space weather events, frequently caused by coronal*

*mass ejections (CME) (Gonzalez et al., 1994; Vázquez et al. 2006). This was the case of well studied extreme space weather events as those occurred on September 1770 (Hayakawa et al. 2017a); the Carrington event in August/September 1859 (Green and Boardsen, 2006; Green et al., 2006; Humble 2006; Tsurutani et al., 2003; Cliver and Dietrich, 2013; Hayakawa et al., 2019a); the storm on 1872 February (Hayakawa et al. 2018; Silverman, 2008); the extreme event on September 1909 (Hayakawa et al., 2019b); May 1921 (Hapgood, 2019; Silverman and Cliver, 2001; Love et al., 2019) or March 1989 (Allen et al., 1989) resulting in extreme magnetic disturbances and auroral displays at very low latitudes.”*

R2: I advice the authors to cite Gonzalez et al. (1994) and Daglis et al. (1999) for its references, rather than Vazquez et al. (2014).

*A: References have been substituted as indicated.*

*Gonzalez, W. D., Joselyn, J. A, Kamide, Y., Kroehl, H. W., Rosoker, G., Tsuruani ,B. T. and Vasyliuna, V. M.: What is a geomagnetic storm?, J. Geophys. Res., 99, 5771-5792, doi.org/10.1029/93JA02867, 1994.*

*Daglis, I. A.: The terrestrial ring current: Origin, formation, and decay, Reviews of Geophysics, 37, 407-438, doi 10.1029/1999RG900009, 1999*

R2: The space weather hazards are not only geomagnetically induced currents, but also satellite drags (Oliveira and Zesta, 2019) or atmospheric radiations (Dyer et al., 2018). These details should be cited with actual cases reports/predictions (Nakamura et al., 2018; Love et al., 2018; Boteler, 2019) and reviews (Pulkkinen et al., 2017; Ngwira and Pulkkinen, 2018; Riley et al., 2018; Oliveira et al., 2018).

*A: Following the suggestion of the referee we have include some actual cases and mentioned explicitly some space weather hazards:*

*“It is important to note that extreme space weather events of these magnitude can provoke important impacts on our highly technological dependent society, especially in activities related with the aviation, the GPS signals, radio communication, and the electric power grid (Baker et al., 2008; Ridley et al., 2018). “*

R2: Given the magnetic latitude of Béziers (50.2° MLAT), I would consider this aurora not as “low-latitude aurora” but as “mid-latitude aurora”. In comparison with auroral ovals during the extreme storms like the Carrington event (~30° MLAT), I consider that this extent is confined in mid magnetic latitude.

*A: Thank you, for the comment we have considered the Rozier aurora as mid latitude, modifying the title and the text accordingly.*

R2: The references on the Carrington event should be updated.

*A: Thank you, the event of the 1859 described as: “the Carrington event in August/September 1859 (Green and Boardsen, 2006; Green et al., 2006; Humble 2006; Tsurutani et al., 2003; Cliver and Dietrich, 2013; Hayakawa et al., 2019a); “ has the following references:*

*Green, J. L. and Boardsen, S.A.: Duration and extent of the great auroral storm of 1859, Adv. Space Res. 38, 130–135, 10.1016/j.asr.2005.08.054, 2006.*

*Green, J.L., Boardsen, S. A, Odenwald, S., Humble, J. and Pazamickas, K.A.: Eyewitness reports of the great auroral storm of 1859, Adv.Space Res. 38-2, 145-154, doi.org/10.1016/j.asr.2005.12.021, 2006.*

*Humble, J.: The solar events of August/September 1859 – Surviving Australian observations, Adv. Space Res. 38, 155–158, 10.1016/j.asr.2005.08.053, 2006.*

*Tsurutani, B. T., Gonzalez, W. D., Lakhina, G. S. and Alex, S.: The extreme magnetic storm of 1–2 September 1859, J. Geophys. Res., 108, 1268, doi:10.1029/2002JA009504, 2003.*

*Cliver, E. W. and Dietrich, W. F.: The 1859 space weather event revisited: limits of extreme activity, J. Space Weather Space Clim. 3, A31, doi: 10.1051/swsc/2013053, 2013.*

*Hayakawa, H., Ebihara, Y., Willis, D.M., Toriumi, S., Iju, T., Hattori, K., Wild, M. N., Oliveira, D. M., Ermolli, I., Ribeiro, J. R., Correia, A.P., Ribeiro, A. I. and Knipp, D. J: Temporal and Spatial Evolutions of a Large Sunspot Group and Great Auroral Storms Around the Carrington Event in 1859, Adv. Space Res, 17, 1553–1569. <https://doi.org/10.1029/2019SW002269>, 2019a.*

R2: The reference of Green et al. (2014) is probably Green et al. (2006), as long as checking the NASA ADS database.

*A: The referee is right, the reference has been amended.*

R2: Three benchmark articles for this event should be cited in this context (Tsurutani et al., 2003; Cliver and Dietrich, 2013; Hayakawa et al., 2019a).

*A: References have been added as indicated.*

R2: Moreover, recent studies have located at least three rivaling storms with extremely low-latitude auroral visibility: 1872 Feb (Silverman, 2008; Hayakawa et al., 2018) and 1921 May (Silverman and Cliver, 2001; Hapgood, 2019; Love et al., 2019). These cases should be documented as well.

*A: Thank you. The section has been updated as follows: “the storm on 1872 February (Hayakawa et al. 2018; Silverman, 2008); the extreme event on September 1909 (Hayakawa et al., 2019b); May 1921 (Hapgood, 2019; Silverman and Cliver, 2001; Love et al., 2019) or March 1989 (Allen et al., 1989) resulting in extreme magnetic disturbances and auroral displays at very low latitudes.” Adding the quoted references:*

*Hayakawa, H., Ebihara, Y., Willis, D. M., Hattori, K., Giunta, A. S., Wild, M. N., Hayakawa, S., Toriumi, S.: The Great Space Weather Event during 1872 February Recorded in East Asia, The Astrophysical Journal, 862, 15. doi: 10.3847/1538-4357/aaca40, 2018.*

*Hayakawa, H., Ebihara, Y., Cliver, E. W., Hattori, K., Toriumi, S., Love, J. J., Umemura, N., Namekata, K., Sakaue, T., Takahashi, T., and Shibata, K.: The extreme space weather event in September 1909. Monthly Notices of the Royal Astronomical Society, 484, 3, 4083-4099. DOI: 10.1093/mnras/sty3196, 2019b.*

*Hapgood, M.: The Great Storm of May 1921: An Exemplar of a Dangerous Space Weather Event, Adv. Space Res., 17, 950–975. <https://doi.org/10.1029/2019SW002195>, 2019*

*Love, J. J., Hayakawa, H. and Clive, E. W.: Intensity and Impact of the New York Railroad Superstorm of May 1921, Adv. Space Res, 17, 1281–1292. [doi.org/10.1029/2019SW002250](https://doi.org/10.1029/2019SW002250), 2019.*

*Silverman, S.M. and Cliver, E.W.: Low-latitude auroras: the magnetic storm of 14 –15 May 1921, J. Atmos. Sol-Terr. Phys. 63, 523–535, [doi.org/10.1016/S1364-6826\(00\)00174-7](https://doi.org/10.1016/S1364-6826(00)00174-7), 2001*

Silverman, S.M.: *Low-latitude auroras: The great aurora of 4 February 1872*, *J. Atmos. Sol.-Terr. Phys.* **70**, 1301- 1308, doi.org/10.1016/j.jastp.2008.03.012, 2008.

Allen, J., Frank, L., Sauer, H. and Reiff, P.: *Effects of the March 1989 Solar Activity*, *EOS*, **70**, 1479-1488. doi: 10.1029/89EO004090, 1989.

R2: The usage of LLA as historical solar activity is another story. I would rephrase this as “Being footprints of solar eruptions, the mid-latitude aurorae (or low-latitude aurorae) are considered as proxies for the long-term solar variability”, citing several relevant articles such as Silverman (1992), Lockwood and Barnard (2015), Lockwood et al. (2016), Vázquez et al. (2016), and Hayakawa et al. (2017).

*A: The sentence has been re-phrased as follows: “Low and mid latitude auroras nights show an association with solar activity indices as sunspot records. This link has been observed during the telescopic era (Silverman, 1992; Lockwood and Barnard, 2015; Lockwood et al., 2016) but also in pre-telescopic era from the comparison with naked-eye sunspot reports (Hayakawa et al. 2017a; Bekli and Chadou, 2019). This relationship is due mainly to the highest frequency of LMLAs during the maximum and the decaying phase of the solar cycle (Gonzalez et al., 1994). Therefore, the mid-latitude aurorae, being footprints of solar CMEs, can be considered as proxies for the long-term solar activity. Nevertheless, LMLAs sometimes occurred in periods of low solar activity (Silverman 2003; Willis et al. 2007; Vaquero et al., 2007 and 2013; Garcia and Dryer, 1987 and Hayakawa et al., 2020). These auroras are called “sporadic auroras”. “*

*and references have been added:*

Silverman, S.M.: *Secular variation of the aurora for the past 500 years*, *Rev. Geophys.*, **30**, 333-351, doi.org/10.1029/92RG01571, 1992.

Lockwood, M., and Barnard, L.: *An arch in the UK*, *Astronomy & Geophysics*, **56**, 4.25–4.30, doi.org/10.1093/astrogeo/atv132, 2015.

Lockwood, M., Owens, M.J., Barnard, L., Scott, C.J., Usoskin, I.G. and Nevanlinna, H.: *Tests of Sunspot Number Sequences: 2. Using Geomagnetic and Auroral Data*, *Sol. Phys.*, **291**, 2811–2828, doi 10.1007/s11207-016-0913-2, 2016.

Hayakawa H., Tamazawa H., Ebihara Y., Miyahara H., Kawamura A. D., Aoyama T. and Isobe H.: Records of sunspots and aurora candidates in the Chinese official histories of the Yuán and Míng dynasties during 1261–1644, *Publ. Astron. Soc. Jpn* 69, 65, doi: 10.1093/pasj/psx045, 2017a.

Bekli ,M.R., and Chadou, I.: Analysis of pre-telescopic sunspots and auroras from 8th to 16th century. *Adv. Space Res.* 64, 1011-1018, 2019.

Gonzalez, W. D., Joselyn, J. A, Kamide, Y., Kroehl, H. W., Rosoker, G., Tsuruani ,B. T. and Vasyliuna, V. M.: What is a geomagnetic storm?, *J. Geophys. Res.*, 99, 5771-5792, doi.org/10.1029/93JA02867, 1994.

Willis, D.M., Stephenson, F.R. and Fang H.: Sporadic aurorae observed in East Asia. *Ann. Geophys.*, 25, 417-436, doi.org/10.5194/angeo-25-417-2007, 2007.

Vaquero, J.M., Trigo, R.M., Gallego, M.C.: Sporadic aurora from Spain. *Earth Planets Space*, 59, 49-51, doi.org/10.1186/BF03352061, 2007.

Vaquero, J.M., Gallego, M.C. and Domínguez-Castro, F.: A possible case of Sporadic Aurora in 1843 from Mexico. *Geofísica Internacional* 52, 87-92, 2013.

Garcia, H. A. and Dryer, M.: The Solar Flares of February 1986 and the Ensuing Intense Geomagnetic Storm, *Sol. Phys.* 109, 119-137, doi.org/10.1007/BF00167403, 1987.

Hayakawa, H., Ribeiro, P., Vaquero, J. M., Gallego, M. C., Knipp, D. J., Mekhaldi, F., Bhaskar, A., Oliveira, D. M., Notsu, Y., Carrasco, V. M. S., Caccavari, A., Veenadhari, B., Mukherjee S. and Ebihara Y.: The Extreme Space Weather Event in 1903 October/November: An Outburst from the Quiet Sun, *Astrophys. J. Lett.*, DOI: 10.3847/2041-8213/ab6a18, 2020.

R2: Caveats must be noted here, however. Even when the solar activity is low, several great magnetic storms with significant auroral displays are reported as well (Garcia and Dryer, 1987; Hayakawa et al., 2020). This caveat should be clarified too.

A: Thank you. References have been added as indicated and the section has been updated as described in our previous answer.

## 2. Methodology

R2: It is nice to cite Rozier's portrait and personal detail in this article. However, citing them from wikisource or other online resources is not the best scientific practice. Please specify their original references in the publications and cite them accordingly. The reference clarifications are especially important as most of P2 of this manuscript is devoted to its explanation and the readers may wish to know more about him with appropriate references.

*A: The Reference: Gutton, J.P. and Bonnet, J. C., Guton J. P. (Ed): Les Lyonnaises dans l'Histoire, Privat, 1991 has been substituted.*

### **3. Analyses of the Observations**

R2: The analyses seem sound but some improvements seem advised.

The description of ““a flash started from the end of the lower area...””. This is a frequent structure of the aurorae (Vaquero & Vasquez, 2009)” may be flaming of auroral display (Störmer, 1955). If the description of “a main structure of two bands oriented east to west” means westward auroral motion, this sounds consistent to the westward traveling surge (Ebihara and Tanaka, 2015).

*A: The section related to the Shape of the auroral event has been completely updated as follows:*

*“Shape: Related to the shape description, Rozier was very accurate. The main structure described by Rozier is : “it formed a zone, a phosphoric band...at a height of 3 feet....and finally it formed an angle of 60°.... above this first luminous zone a second [zone] of the same height was formed, but with 30° of extension only i.e. half of that of the lower zone. Between one and the other a void remained, the height of which matched that one of the two connected zones”. This description may fit with the report of the auroral forms class without ray structure i.e. homogeneous arcs or uniform diffuse surface, and homogenous bands too (Störmer, 1955).*

*Nevertheless the beginning of the aurora could resemble some aspect of an auroral sub-storm expansion (Ebihara et al., 2017 and Stephenson et al., 2019) which is characterized by initial brightening of aurora, followed by a bulge expanding in all directions (Akasofu, 1964; Akasofu et al., 1965) “I noticed a luminous point...this luminous point acquired slowly [over time] volume and intensity”. Moreover, Rozier records some flaming during the event “in one or in the other zone I noticed irregularities, as well as on the edges of those big white clouds [i.e. general mass or bulge]. This edge was not homogeneously bright, although in the center presented uniform bright. In the time over which the zones moved Eastward.... a flash started from the end of the lower area [of the general mass or bulge]”.*

R2: The whitish auroral colour are explained with “the enhancement of the 630,0 nm [OI] emission caused by soft electrons (<100 eV) precipitating from the plasmasphere” in this manuscript. However, I suspect the whitish colour may be explained to the enhancement of the 557.7 nm of Oxygen with weak brightness or its mixture with other emissions as well (e.g., Ebihara et al., 2017; Stephenson et al., 2019). Rather than citing Abbott and Juhl's statistics, it would be more

straightforward to cite actual observational cases of whitish aurorae (See Section 6 of Stephenson et al., 2019).

*A: The section has been updated as well as the references as follows:*

*“Color: He carefully mentioned the color: “whitish color of phosphorus burning in the open air”. As stated by Stephenson et al. 2019 at Low-Mid geomagnetic latitude, northern lights have generally higher probability to be observed if they are reddish, however in case of an auroral display without enough brightness, it tends to appear whitish to the human eye. In addition, such effect of the human eye is enhanced if the moon is also present in the sky as the eye cannot be “dark adapted”. Moreover, the whitish auroral color may be explained with the enhancement of the 557.7 nm of Oxygen with weak brightness or due to the Oxygen mixture with other emissions as well (Ebihara et al., 2017; Stephenson et al., 2019). Examples of observation which confirm that LMLA are whitish in color during extreme space weather events are reported by Ebihara et al. 2017; Green and Boardsen, 2006; Hayakawa et al. 2017b and Willis et al.1996. Rozier observed a white aurora, this made the phenomena more unusual and increase the possibility of misinterpretation of the phenomenon by Rozier himself.”*

**R2:** For the sunspot number analyses, the authors need to cite the data source “WDC SILSO” appropriately. Likewise, the authors need to mention the WDC SILSO in the acknowledgment.

*A: The reference has been corrected and quoted as required in the website i.e. SILSO, World Data Center - Sunspot Number and Long-term Solar Observations, Royal Observatory of Belgium, on-line Sunspot Number catalogue: <http://www.sidc.be/SILSO/>, ‘year(s)-of-data’.*

*In the Acknowledgment we wrote: “Credits for the use of Sunspot data to the World Data Center SILSO, Royal Observatory of Belgium, Brussels.”*

**R2:** I would strongly recommend the authors to cite Clette et al. (2014) and Clette and Lefevre, 2016) for this dataset.

*A: References added in the reference list and in the text as follows:*

*Clette, F. and Lefèvre, L.: The New Sunspot Number: Assembling All Corrections, Sol. Phys., 291, 2629-2651, doi 10.1007/s11207-016-1014-y, 2016.*

*Clette, F., Svalgaard, L., Vaquero, J. M. and Cliver, E. W.: Revisiting the Sunspot Number A 400-Year Perspective on the Solar Cycle, Space Sci. Rev.,186, 35–103, doi10.1007/s11214-014-0074-2, 2014.*



R2: I suspect that the cause of this storm is probably better explained with the coronal mass ejections (see Gonzalez et al., 1994; Daglis et al., 1999) rather than the high-speed solar wind from the corona hole.

*A: This was clarified immediately in the background and introduction: "Low and Mid latitude auroras (LMLAs) are usually associated with intense space weather events, frequently caused by coronal mass ejections (CME) (Gonzalez et al., 1994; Daglis, 1999; Vázquez et al. 2006). "*

## **Conclusion**

R2: The conclusion needs to be more developed to be an independent original article.

*A: The conclusions have been rewritten as follows:*

*" We have found a record of an atmospheric phenomenon observed on 15 August 1780 in Beausejour, close to Béziers (43° 19' N, 3° 13' E), France, by the abbot Francois Rozier described as a "big white cloud ... whitish color of phosphorus burning in the open air". Rozier was not an astronomer and it is clear that he did not fully understand the phenomenon he was recording. Probably for this reason he recorded the event with minute details to later discuss it with other academicians of his time. Thanks to this accuracy, we have been able to analyse quantitative information and facts that contribute to confirm that Francois Rozier observed a Mid latitude aurora that night. The aurora was observed during the nautical and astronomical twilight, it was white, enough brilliant to not be overshadowed by the full moon which however was above the horizon in ESE direction. It showed two bands and some rays which could fit with the class of auroral forms of both homogeneous arcs/uniform diffuse surface, and homogenous bands. Its temporal evolution could also resemble an auroral sub-storm expansion.*

*This auroral event contributes to enlarge the geomagnetic knowledge of the late 18th century period in which the geomagnetic and the solar activity have high uncertainties due to few sunspot and LMLA observations reported from primary sources.*

*The Rozier record is a clear case of how, a scientist from a research field far from Astronomy or Meteorology in the 18th century, could record and publish descriptions on atmospheric phenomena that he did not fully understand but however he considered worth to be documented. These sources are very valuable because they report details of infrequent and/or partially unknown atmospheric phenomena. In this case the Rozier's report had contributes to enlarge the geomagnetic knowledge of a period with low information. "*

## **Supplement**

R2: It may be helpful to reproduce the French text here, as the authors stated “complete original French version is reported in the Supplementary Materials”.

*A: Both pages of the original text have been added in Figure 1. The sentence in the manuscript has been corrected consequently.*

### **Minor Comments**

R2: P1L12: The authors need to be consistent for the usage of Béziers or Bezier.

*A: The text has been corrected using Béziers all times.*

R2: By the ways, isn't the observational site Beauséjour? If this is the case, the coordinate should be N43°19', E3°13'.

*A: Corrected*

R2: P1L20: disturbs => disturbances

*A: The term has been amended as indicated.*

R2: P1L22: Babylonians (Stephenson et al., 2004) => Assyrians and Babylonians (Stephenson et al., 2004; Hayakawa et al., 2016, 2019b)

*A: Text has been integrated as required as well as references.*

R2: P1L30: “require an accurate analysis to avoid possible misinterpretations” => Cite Kawamura et al. (2016), Usoskin et al. (2017), and Stephenson et al. (2019) here.

*A: References have been added as required i.e.*

*Kawamura A.D., Hayakawa H., Tamazawa H., Miyahara H. and Isobe H.: Aurora candidates from the chronicle of Qíng dynasty in several degrees of relevance, Publ. Astron. Soc. Japan, 68, 79, doi: 10.1093/pasj/psw074, 2016.*

*Usoskin, I.G., Kovaltsov, G.A., Mishina, L.N., Sokoloff, D.D. and Vaquero, J.: An Optical Atmospheric Phenomenon Observed in 1670 over the City of Astrakhan Was Not a Mid-Latitude Aurora, Sol. Phys., 292, 15. DOI: 10.1007/s11207-016-1035-6, 2017.*

*Stephenson, F. R., Willis D. M., Hayakawa, H., Ebihara, Y., Scott, C. J., Wilkinson, J. Wild, M. N.: Do the Chinese Astronomical Records Dated AD 776 January 12/13 Describe an Auroral Display or a Lunar Halo? A Critical Re-examination, Sol. Phys. 294, 36, doi.org/10.1007/s11207-019-1425-7, 2019.*

R2: P2: Please italicise the journal titles.

*A: Journal titles have been italicized.*

R2: P2L48: Béziers (Beauséjour) => Beauséjour in the suburb of Béziers

*A: The sentence has been modified as indicated.*

R2: P3L68: “reported below in English” => “reported below in our English translation”

*A: The expression has been modified as indicated.*

R2: P3L95: “proved” => “proven”

*A: The error has been corrected.*

R2: P3L104: “the measure of time of the French Hours that lasted until the French Revolution in 1789” => Please cite a reference for this statement.

*A: the text has been modified as follows:” Hour of Observation and sun depression angle: Rozier describes the starting (20:05) and ending (20:17) hour of his observation as local solar time (LST) i.e. the measure of local time as in use in the XVIII century. The pendulum clocks locally could be*

*synchronized following the daily data reported in the Ephemerides with the time of the sunrise, midday and sunset published yearly (Jeaurat, 1780). “*

*The Ephemerides from the Observatory of Paris for the year of the observation of Rozier has been quoted: “Jeaurat, E.S : Connaissance des Temps pour l’Année bissextile 1780, Publiée Par l’ordre de l’Académie Royale des Sciences, et calculée par M. Jeaurat, de la meme Académie. De l’Imprimerie Royale, Paris, 1780. »*

R2: P3L104: “These times correspond” => “Given its longitude, these time stamps correspond”

*A: The sentence has been integrated as indicated.*

R2: P3L105: “nautical twilight” => “astronomical twilight”

*A: Done.*

R2: P4L122-123: For auroral audibility, cite the review of Silverman and Tuan (1973).

*A: Done. The section has been rewritten as follows:” Noise: Silverman and Tuan (1973) said that from observational evidence, the most likely sound accompany auroral observations could derive from discharges generated by aurorally associated electric fields. Rozier, although in his observation reported: “It appeared [to me] that these areas were a simple mass of steam, only charged by electricity, which it made them transparent and phosphoric”. However, he concluded saying that: “for three different times, a flash, with almost null noise, started from the end of the lower area [i.e. the bulge] ... [and again] when the light flashed ...there was no blast”. This absence of sound recorded by Rozier discard a possible misinterpretation with other noisy atmospheric phenomena.”*

*The reference has been added as required:*

*Silverman, S.M. and Tuan, T.F.: Auroral Audibility, Ad. Geophys., 16,155-266, doi.org/10.1016/S0065-2687(08)60352-0, 1973.*

R2: P5L124-128: For bright aurorae visible during night with the full moon, it would be advised to reinforce the existing discussions with actual observational cases cited in Stephenson et al. (2019) and Hattori et al. (2019).

A: The section has been updated as follows:” Moon: whether or not an aurora is overshadowed by the moon depends on the lunar phase, the brightness of the aurora, and the angular distance between the moon and the sky position occupied by auroral emission (**Stephenson et al. 2019**). Rozier does not report any information about the moon. But the moon was in the sky that day. The moon, on 15 August 1780 was full moon and rose at 19:25 (UT) at an azimuth angle of 111.4° ESE direction, i.e. opposite respect the direction of observation of Rozier and close to the horizon. During the time Rozier observed the phenomenon, the moon was at azimuth angle 116.5° and elevation angle 3.4° (at 19:55 UT) while at the end of his observation it was at azimuth angle 118.5° and elevation angle 5.3° (at 20:07 UT) therefore always in the direction ESE. The short time of the observation suggests that although the aurora was highly bright because Rozier could record it with full moon in the sky (**Stephenson et al., 2019; Hattori et al., 2019**), however because of the moon rise above the horizon the light conditions could hinder the visibility of the aurora as well as the presence of tropospheric clouds. In literature several auroral observations are reported during full moon e.g. those observed on the 18 February and on 12 November 1837 (**Olmsted, 1837; Snow, 1842**), those reported by Martin, 1847 and Glaisher, 1847 on October 24 of that year, and the event observed on 4 September 1908 described by **Barnard, 1910**.”

Reference added in the reference list:

Stephenson, F. R., Willis D. M., Hayakawa, H., Ebihara, Y., Scott, C. J., Wilkinson, J. Wild, M. N.: Do the Chinese Astronomical Records Dated AD 776 January 12/13 Describe an Auroral Display or a Lunar Halo? A Critical Re-examination, *Sol. Phys.* 294, 36, doi.org/10.1007/s11207-019-1425-7, 2019.

Hattori, K., Hayakawa, H. and Ebihara, Y.: Occurrence of Great Magnetic Storms on 6–8 March 1582, *Mon. Not. R. Astron. Soc.*, 487, 3550–3559, doi.org/10.1093/mnras/stz1401, 2019.

Olmsted, D.: Observations on the aurora borealis on Jan. 25, 1837 *Am. J. Sci. Arts* 32, 176, 1837.

Snow, R.: *Observations of the Aurora Borealis. From September 1834 to September 1839*, Moyes & Barclay, London, 1842.

Barnard, E.E.: *Observations of the aurora, made at the Yerkes Observatory, 1902 – 1909*. *Astrophys. J.* 31, 208, 1910.

R2: P5L137: “15th august 1780” => “15 August 1780”.

A: The date has been corrected.

R2: P5L143: "is" => "it is"

*A: The subject has been added.*

R2: P6L157: "decrease phase" => "declining phase"

*A: The expression has been modified as indicated.*

R2: P6L158: "2-years delayed respect the peak of the highest solar activity" => "2-years after the maximum"

*A: The sentence has been modified as required.*

R2: P6L160: Cite Lefevre et al. (2016) here.

*A: The reference has been added: Lefèvre, L.: Detailed Analysis of Solar Data Related to Historical Extreme Geomagnetic Storms: 1868 – 2010, Sol. Phys., 291, 1483-1531. DOI: 10.1007/s11207-016-0892-3, 2016.*

R2: P6L160: "few solar observation" => "few sunspot observations"

*A: The word has been substituted as indicated.*

R2: P6L162: "very welcomed" => "useful" or "informative"

*A: The word has been substituted as indicated*

R2: P6L164: "this solar observation" => maybe "the nearest solar observation"?

*A: Done*

R2: P6L166: "This is 48 days without sunspot information" => "It means this event occurred in an interval without sunspot data for 48 days".

*A: The sentence has been modified as indicated.*

R2: Figure 1: The two figures are overlapped. They should be separated at least.

*A: Both pages of the document are reported in figure 1 instead of Fig. 1a and Fig 1b.*

R2: The data source of the photograph should be addressed not with the URL but with shelf mark in the Library of Congress Prints and Photographs Division Washington.

*A: Done*

R2 : Figure 3: Cite Clette et al. (2014) and Clette and Lefevre (2016) here.

*A: References have been added:*

*Clette, F. and Lefèvre, L.: The New Sunspot Number: Assembling All Corrections, Sol. Phys., 291, 2629-2651, doi 10.1007/s11207-016-1014-y, 2016.*

*Clette, F., Svalgaard, L., Vaquero, J. M. and Cliver, E. W.: Revisiting the Sunspot Number A 400-Year Perspective on the Solar Cycle, Space Sci. Rev., 186, 35–103, doi10.1007/s11214-014-0074-2, 2014.*

R2. Figure 4: Cite Dominguez-Castro et al. (2016) and Vaquero et al. (2016) here.

*A: References have been added:*

*Domínguez-Castro, F., Vaquero, J.M., Bertolin, C., Gallego, M. C., De la Guia, C. and Camuffo, D. : Aurorae observed by Giuseppe Toaldo in Padua (1766-1797), J. Space Weather Spac., 6, A21, doi.org/10.1051/swsc/2016016, 2016.*

Vaquero, J.M., Svalgaard, L., Carrasco, V.M.S., Clette, F., Lefèvre, L., Gallego, M.C., Arlt, R., Aparicio, A.J.P., Richard, J-G. and Howe, R.: A revised collection of sunspot group numbers. *Sol. Phys.* 291, 3061-3074, [10.1007/s11207-016-0982-2](https://doi.org/10.1007/s11207-016-0982-2), 2016.
